# Supplementary material for: Apical sorting of lysoGPI-anchored proteins occurs independent of association with detergent-resistant membranes but dependent on their N-glycosylation
Source: PubMed Central journal article supplement — Mol Biol Cell. 2013 Jun 15;24(12):2021–33. doi: 10.1091/mbc.E13-03-0160 (PMC3681704; doi:10.1091/mbc.e13-03-0160), 2013-06-15
Supplement: supp_E13-03-0160v1_CombinedSupMats.pdf [file supp_E13-03-0160v1_CombinedSupMats.pdf]

**Figure S1. Apical secretion of endogenous soluble proteins is sensitive to cholesterol depletion**

(A) Cells grown on filters and either mock depleted (Mock) or cholesterol depleted (CD) were pulse-labeled then chased for two hours, and the media from the apical (A) and basolateral (BL) chambers were analyzed. The apical sorting of three major bands (arrows 1–3) was quantified for the parental cell line (CTRL) and for PGAP3–HA cells. (B) The histogram shows mean apical sorting of bands 1–3 and the sum of the three bands (total). (C) The histogram shows the mean percentage of total signal detected (sum of 1–3) normalized to the mock condition shown in A. (B, C) Quantifications are from two independent experiments; the bars indicate the range of values.

A

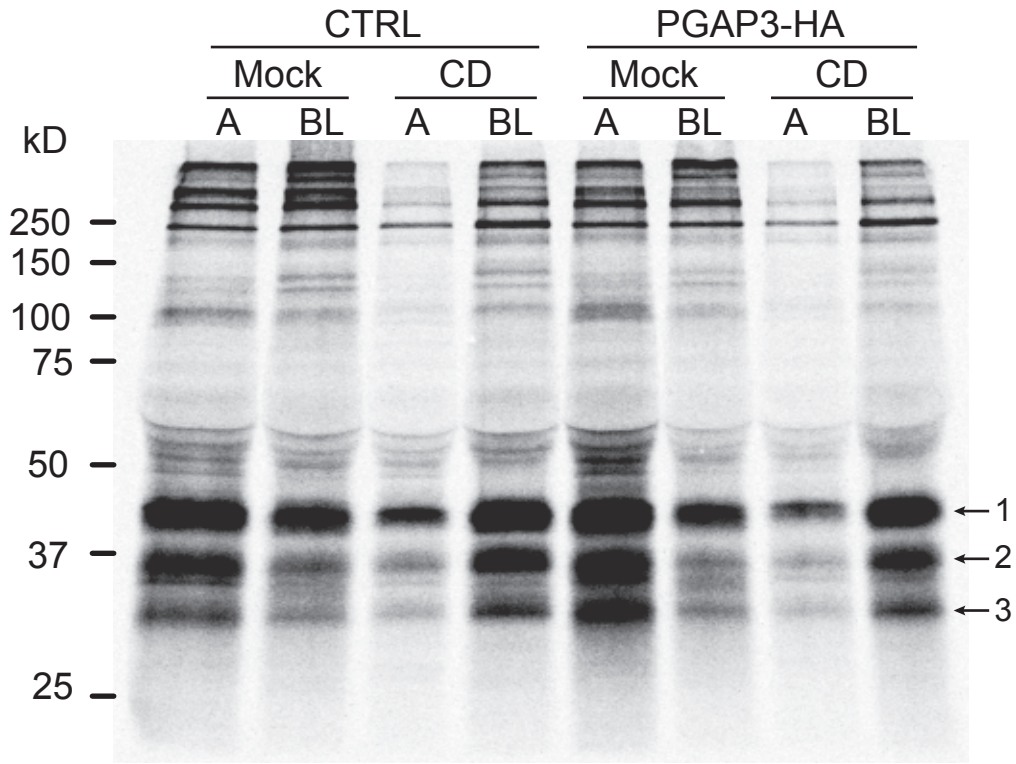

B

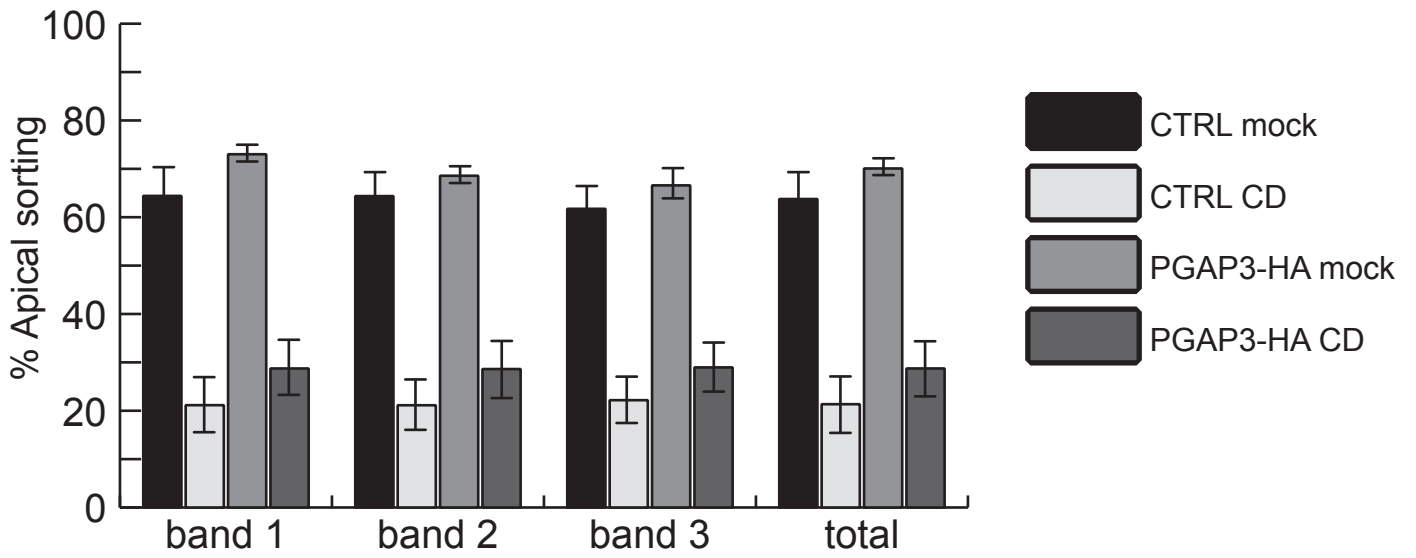

C

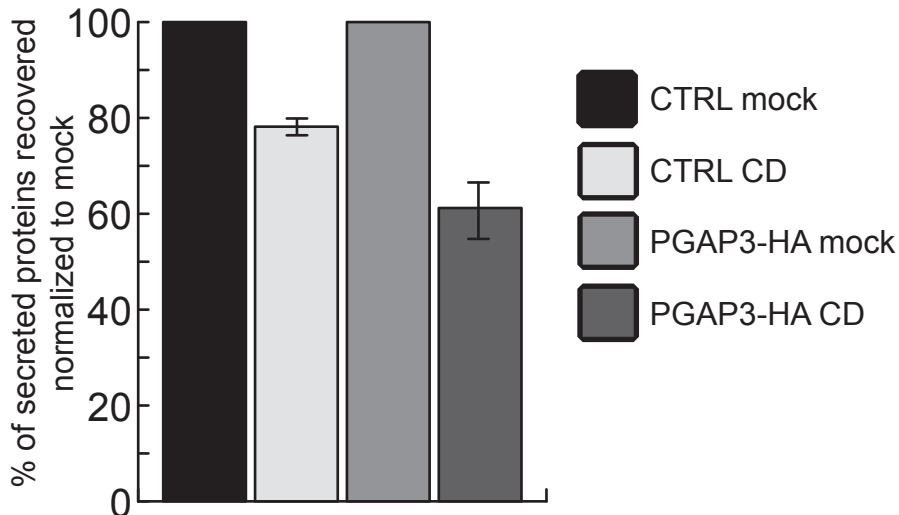

Fig.S1

**Figure S1. Apical secretion of endogenous soluble proteins is sensitive to cholesterol depletion**

(A) Cells grown on filters and either mock depleted (Mock) or cholesterol depleted (CD) were pulse-labeled then chased for two hours, and the media from the apical (A) and basolateral (BL) chambers were analyzed. The apical sorting of three major bands (arrows 1–3) was quantified for the parental cell line (CTRL) and for PGAP3–HA cells. (B) The histogram shows mean apical sorting of bands 1–3 and the sum of the three bands (total). (C) The histogram shows the mean percentage of total signal detected (sum of 1–3) normalized to the mock condition shown in A. (B, C) Quantifications are from two independent experiments; the bars indicate the range of values.
